# Supplementary material for: Clustering mechanism of ethanol-water mixtures investigated with photothermal microfluidic cantilever deflection spectroscopy
Source: PubMed Central journal article supplement (PMC4820714; doi:10.1038/srep23966), 2016-04-05
Supplement: srep23966-s1.pdf [file srep23966-s1.pdf]

## Supplementary information:

### Clustering mechanism of ethanol-water mixture investigated with Photothermal microfluidic cantilever deflection spectroscopy

M. S. Ghoraishi\*, J. E. Hawk, Arindam. Phani, M. F. Khan, T. Thundat\*

Section A) IR spectrum obtained using photothermal microfluidic cantilever deflection spectroscopy (PMCDs) when concentration of EtOH changes from 20 wt% to 100 wt% is deconvoluted using Voigt function. Each concentration was tested three times and here we show only first run of experiments. Following equation shows Voigt function used in this work.

$$y = y_0 + A \left[ \gamma \frac{2}{\pi} \frac{w}{4(x - x_c)^2 + w^2} + (1 - \gamma) \frac{\sqrt{4 \ln 2}}{w\sqrt{\pi}} e^{-\frac{4 \ln 2}{w^2}(x - x_c)^2} \right]$$

Where,  $y$  is profile intensity,  $y_0$  is offset,  $x_c$  is center wavenumber,  $A$  is area,  $w$  is full width half maxima (FWHM) and  $\gamma$  is profile shape factor.

For comparison, spectrum of 100 wt% EtOH obtained using ATR-FTIR is shown in Figure S3.

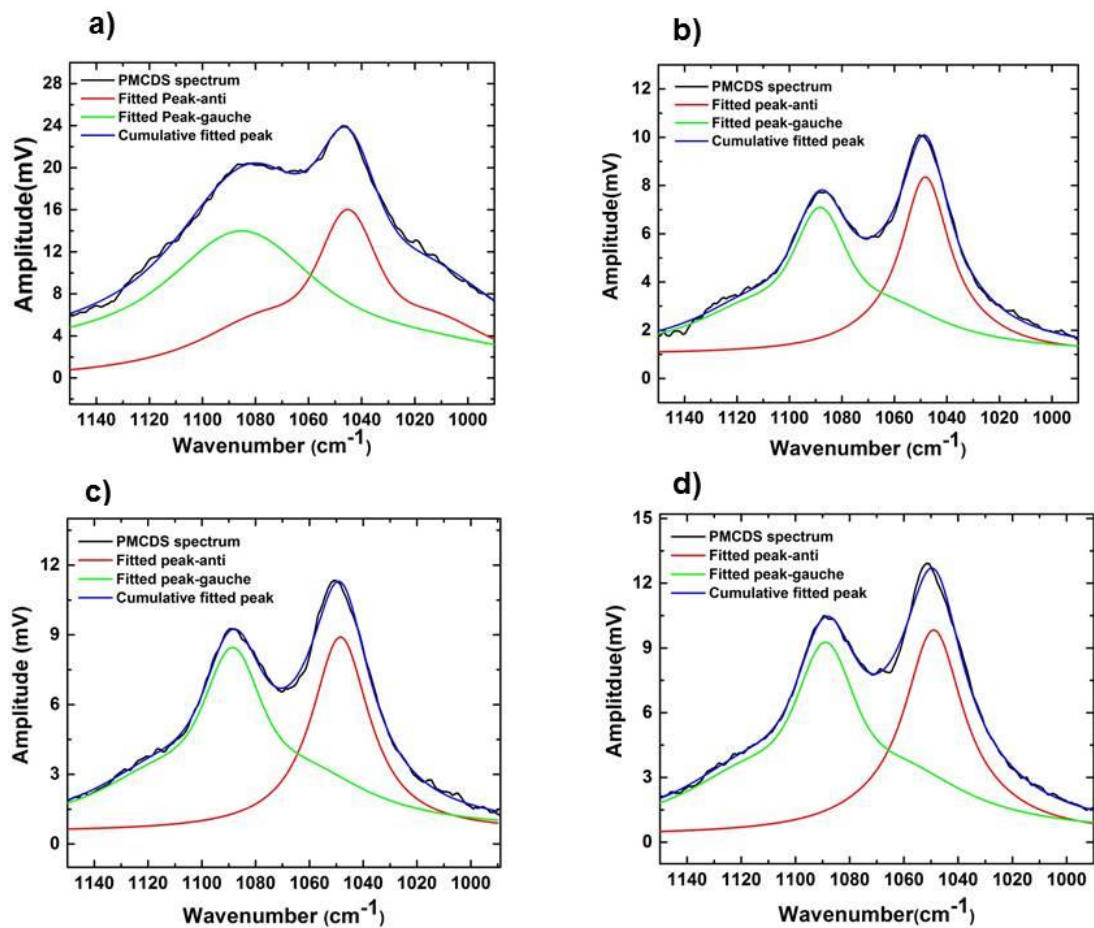

**Supplementary Figure S1:** IR spectrum obtained by PMCDs and deconvolutions of spectrum using Voigt function for the following concentrations of EtOH a) 20 wt% b) 30wt% c) 40wt% and d) 50wt%.

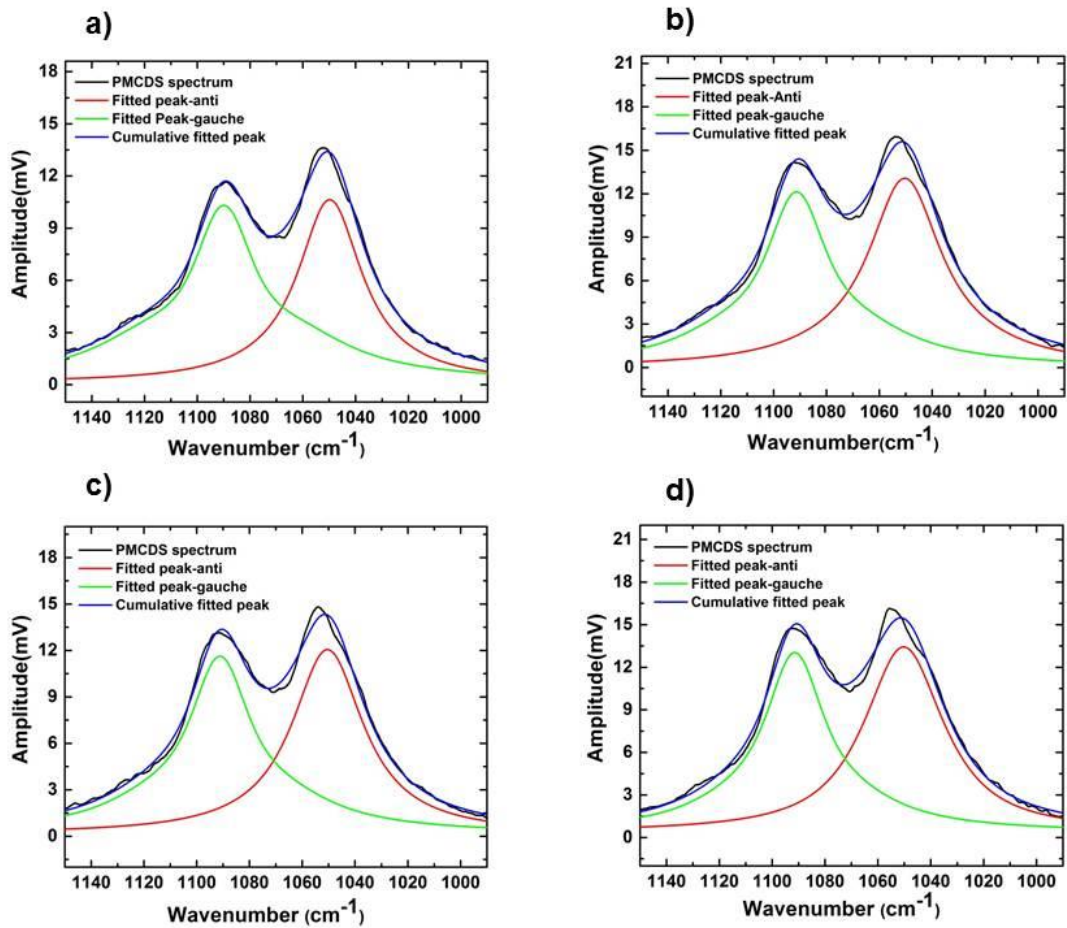

**Supplementary Figure S2:** IR spectrum obtain by PMCDs and deconvolutions of spectrum using Voigt function for the following concentrations of EtOH a) 60wt% b) 70wt% c) 80wt% and d) 90wt%.

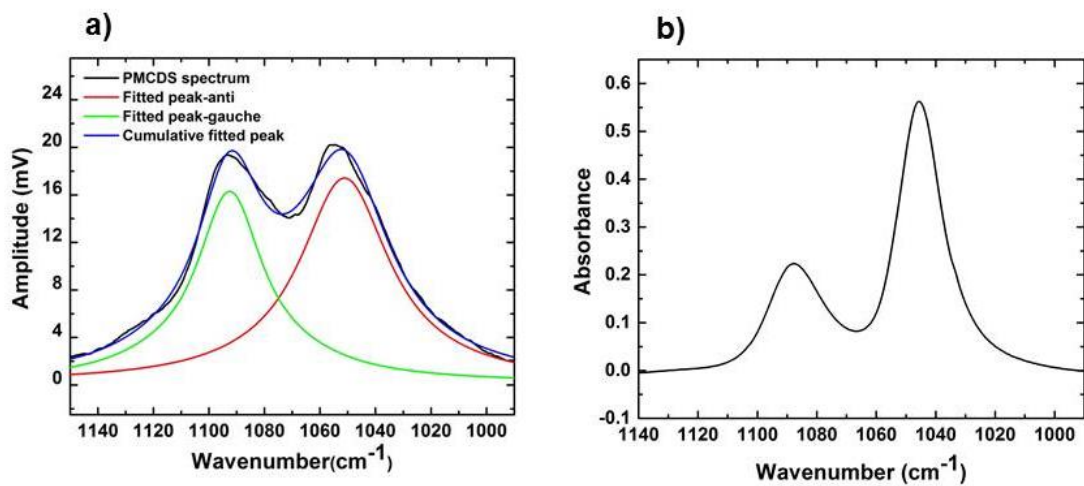

**Supplementary Figure S3:** IR spectrum obtained employing a) PMCDS and b) ATR-FTIR spectrum for 100 wt% EtOH

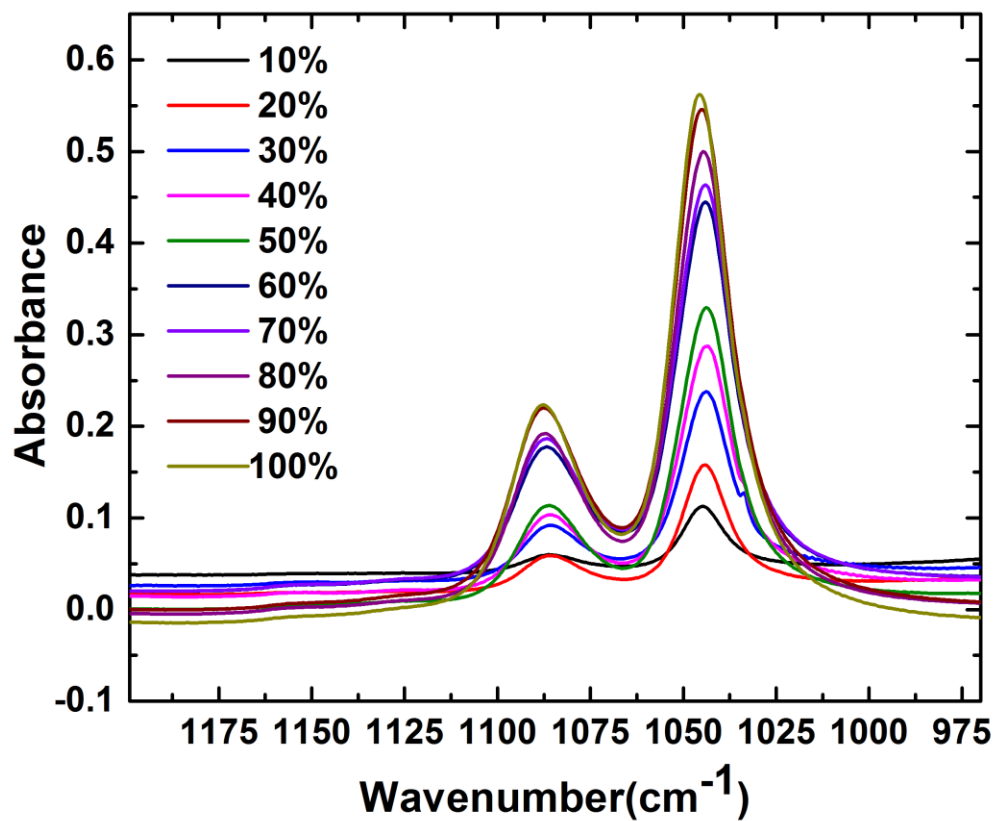

**Supplementary Figure S4:** ATR-FTIR spectrum of EtOH-water mixture as concentration of EtOH changes from 10 wt% to 100 wt%.

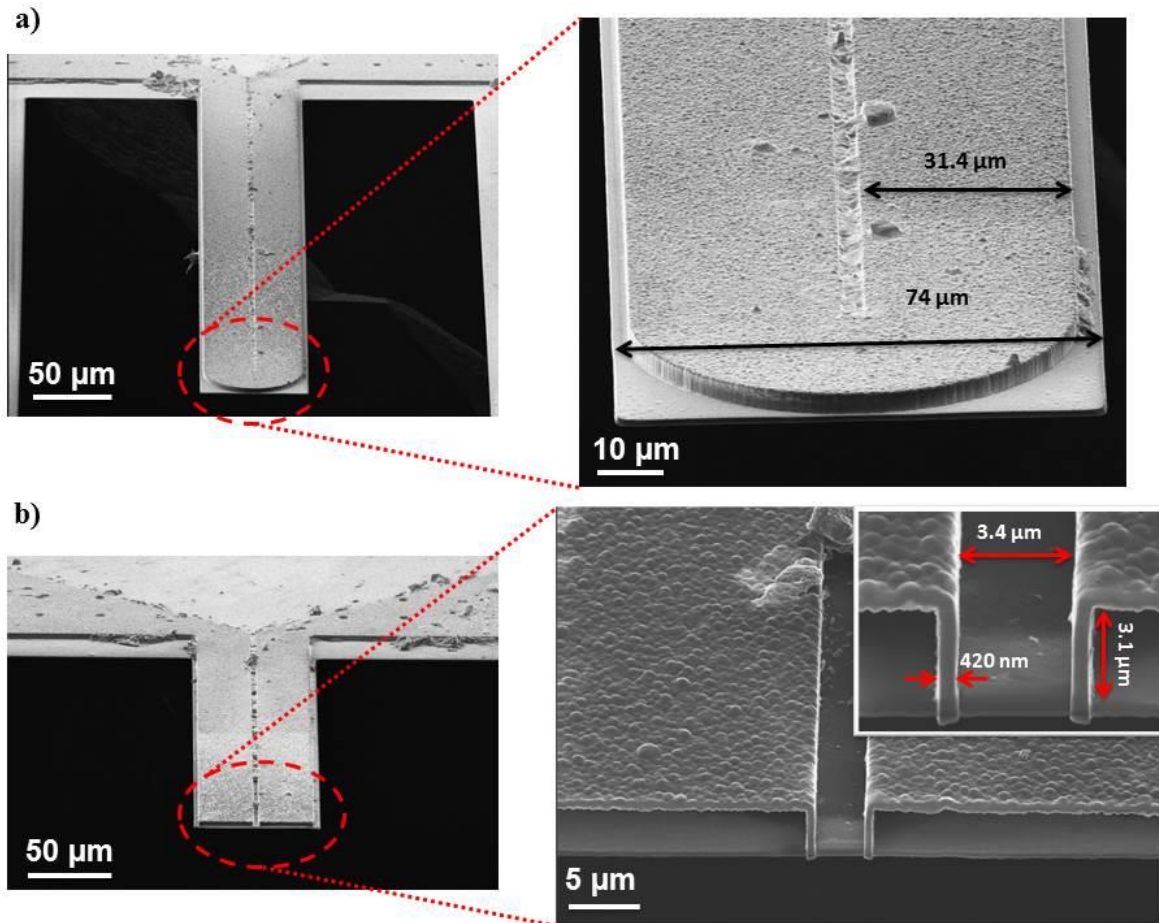

**Supplementary Figure S5:** Scanning Helium Ion Microscope (HiM) image of a microfluidic cantilever a) top view of the microfluidic cantilever and b) top view of a cut microfluidic cantilever and cross section of the channel constructed on the top of cantilever.

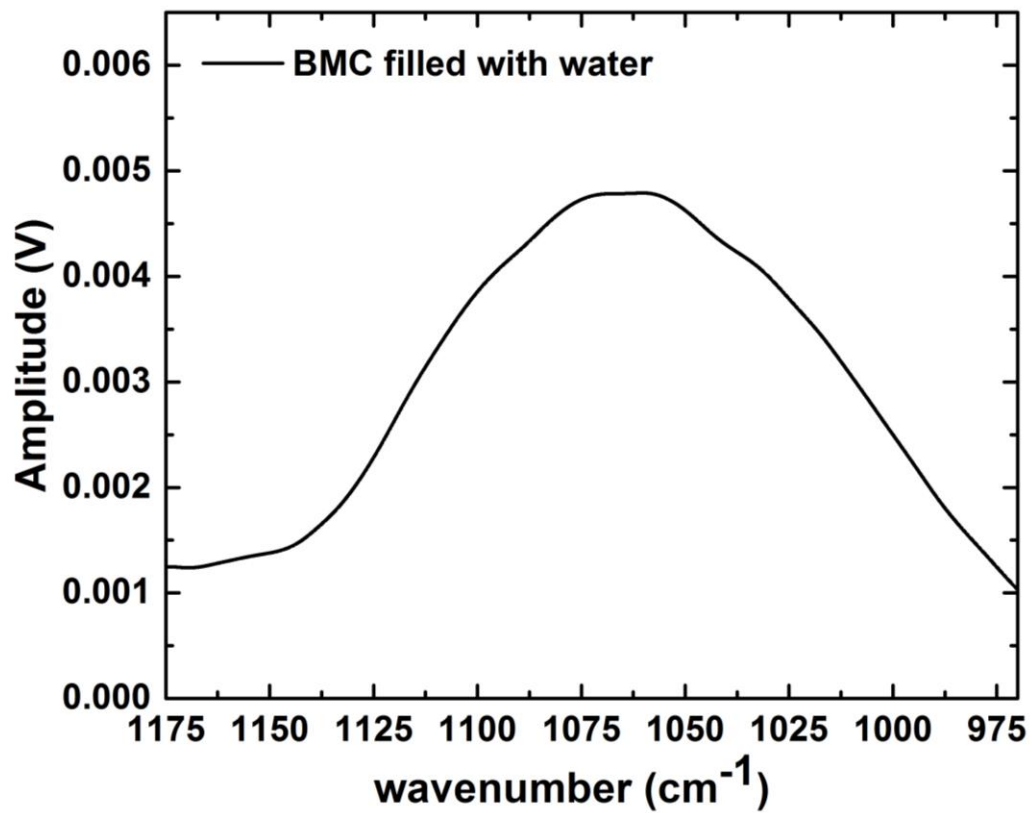

**Supplementary Figure S6:** PMCDS spectrum of bimaterial microfluidic cantilevers (BMC) filled with water used as subtraction reference
